# Supplementary material
Source: MDPI journal article supplement (https://www.mdpi.com/2227-9717/11/11/3170)
Supplement: s1 [file s1]

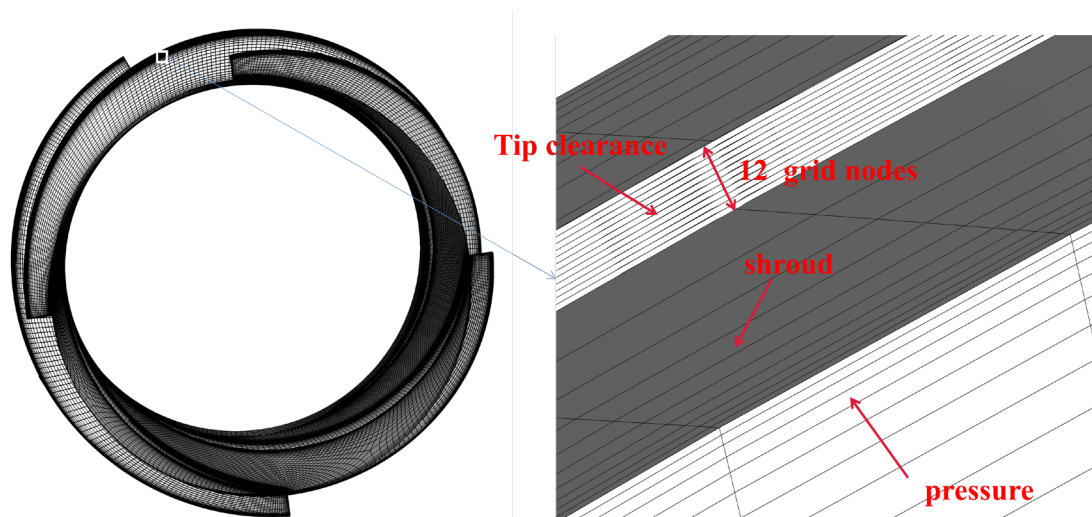

**Figure S1.** Tip clearance grid.

**Table S1.** Main sensor parameters

| Category          | Model                 | Manufacturer   | Measurement Range | Output    | Accuracy   | Power Supply           |
|-------------------|-----------------------|----------------|-------------------|-----------|------------|------------------------|
| Pressure Sensor 1 | PX309                 | Omega          | 0-1000 psi        | 4-20 mA   | ±0.25% FSO | 12-36 VDC              |
| Pressure Sensor 2 | PMP55                 | Endress+Hauser | 0-600 psi         | 4-20 mA   | ±0.1% FSO  | 10-30 VDC              |
| Flow Meter 1      | FMG600                | Omega          | 0.2-20 GPM        | Frequency | ±1.5% FSO  | 12 VDC                 |
| Flow Meter 2      | Proline Prowirl F 200 | Endress+Hauser | 0.03-30 m/s       | 4-20 mA   | ±0.5% FSO  | 24 VDC                 |
| Air Compressor    | Atlas Copco GA 37     | Atlas Copco    | 30-40 CFM         | 37 HP     | ±1% FSO    | 230/460 V, 3 ph, 60 Hz |
| Water Tank        | Specific Model        | N/A            | N/A               | N/A       | N/A        | N/A                    |
| Buffer            | Specific Model        | N/A            | N/A               | N/A       | N/A        | N/A                    |

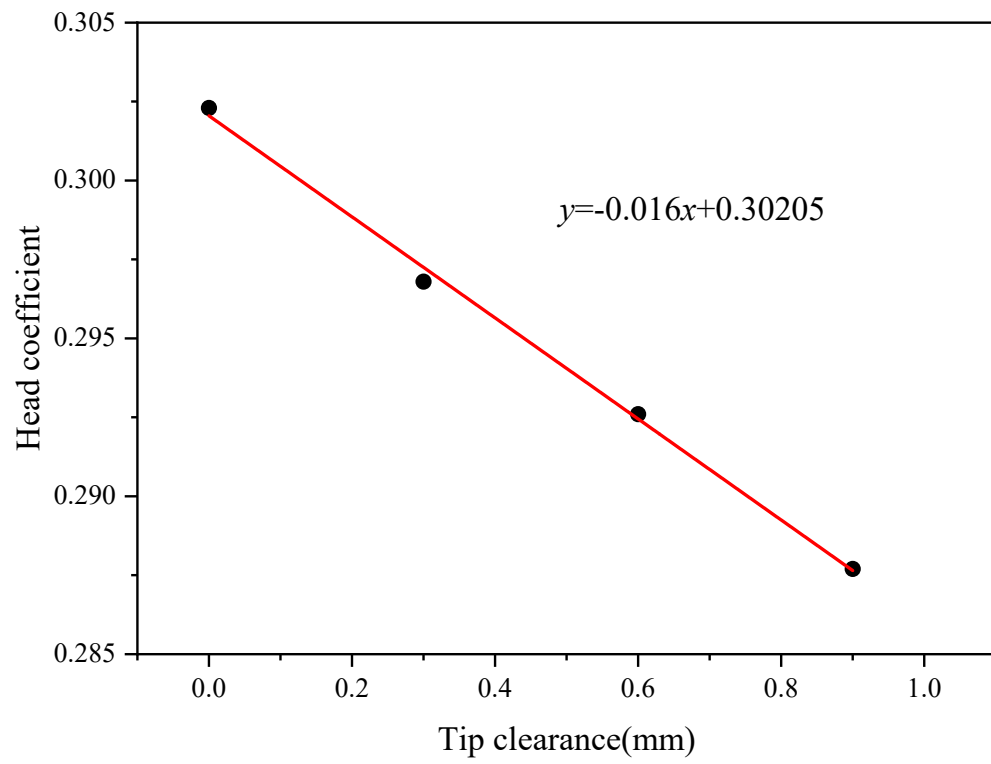

**Figure S2.** Relationship between the gap and head coefficient.
